# Supplementary material
Source: PubMed Central journal article supplement (PMC6905478)
Supplement: DC181444SupplementaryData.pdf [file DC181444SupplementaryData.pdf]

SUPPLEMENTARY DATA

**Supplemental Figure S1. Cumulative distribution of TIR values according to treatment group.** For any TIR level, the percentage of participants in each group with that TIR level or higher can be determined by selecting the TIR level on the x-axis and then identifying the y-axis value of the intersecting point on the curve.

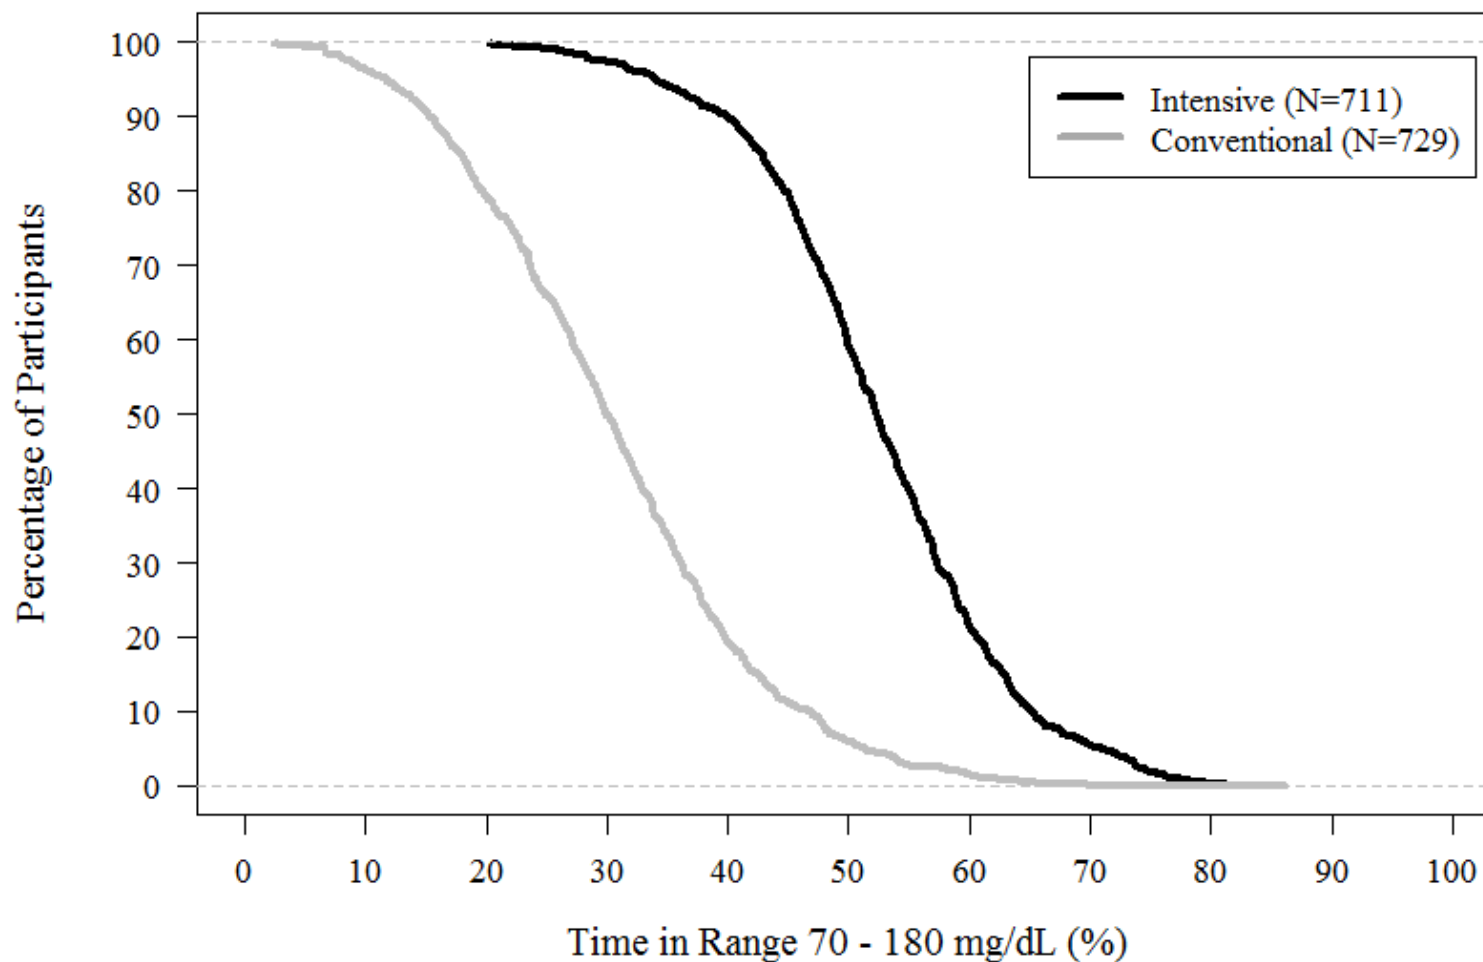

SUPPLEMENTARY DATA

**Supplemental Table S1. Summary of Glucose Metrics according to Complication Development**

|                      | Developed retinopathy during the study? |             | Developed microalbuminuria during the study? |             |
|----------------------|-----------------------------------------|-------------|----------------------------------------------|-------------|
|                      | Yes                                     | No          | Yes                                          | No          |
| Overall              | N=271                                   | N=1169      | N=116                                        | N=1167      |
| % Time in range      | 32 ± 15                                 | 44 ± 15     | 32 ± 14                                      | 42 ± 16     |
| Mean glucose (mg/dL) | 233 ± 54                                | 188 ± 50    | 232 ± 55                                     | 192 ± 52    |
| % Time >180 mg/dL    | 62 ± 18                                 | 46 ± 20     | 61 ± 17                                      | 48 ± 20     |
| % Time >250 mg/dL    | 43 (28, 55)                             | 21 (11, 37) | 40 (28,52)                                   | 23 (12, 40) |
| AUC 180 mg/dL        | 76 (49, 103)                            | 36 (20, 64) | 74 (49, 101)                                 | 39 (21, 70) |
| HBGI                 | 22 (15, 29)                             | 12 (7, 19)  | 22 (15, 28)                                  | 13 (8, 21)  |
| A1C (%)              | 9.3 ± 1.4                               | 7.9 ± 1.3   | 9.1 ± 1.4                                    | 8.1 ± 1.4   |
| Primary Cohort       | N=107                                   | N=619       | N=36                                         | N=662       |
| % Time in range      | 29 ± 14                                 | 43 ± 16     | 28 ± 16                                      | 42 ± 16     |
| Mean glucose (mg/dL) | 243 ± 52                                | 191 ± 52    | 250 ± 61                                     | 196 ± 54    |
| % Time >180 mg/dL    | 65 ± 17                                 | 47 ± 20     | 65 ± 18                                      | 49 ± 21     |
| % Time >250 mg/dL    | 45 (32, 58)                             | 21 (11, 40) | 44 (34, 59)                                  | 24 (12, 43) |
| AUC 180 mg/dL        | 83 (57, 108)                            | 37 (19, 68) | 79 (61, 119)                                 | 40 (20, 75) |
| HBGI                 | 24 (18, 30)                             | 12 (7, 20)  | 23 (18, 32)                                  | 13 (8, 22)  |
| A1C (%)              | 9.6 ± 1.3                               | 8.0 ± 1.4   | 9.4 ± 1.4                                    | 8.2 ± 1.5   |
| Secondary Cohort     | N=164                                   | N=550       | N=80                                         | N=505       |
| % Time in range      | 34 ± 15                                 | 44 ± 14     | 33 ± 12                                      | 43 ± 15     |
| Mean glucose (mg/dL) | 226 ± 54                                | 185 ± 48    | 224 ± 50                                     | 188 ± 48    |
| % Time >180 mg/dL    | 59 ± 19                                 | 45 ± 18     | 59 ± 17                                      | 46 ± 19     |
| % Time >250 mg/dL    | 41 (25, 52)                             | 20 (11, 35) | 38 (26, 50)                                  | 22 (12, 37) |
| AUC 180 mg/dL        | 71 (43, 97)                             | 34 (20, 61) | 68 (45, 96)                                  | 37 (21, 66) |
| HBGI                 | 21 (14, 27)                             | 11 (8, 19)  | 20 (14, 27)                                  | 12 (8, 19)  |
| A1C (%)              | 9.0 ± 1.4                               | 7.8 ± 1.3   | 9.0 ± 1.4                                    | 8.0 ± 1.3   |

Values are mean ± SD or median (quartiles) as appropriate for the distribution.

SUPPLEMENTARY DATA

**Supplemental Table S2. Hazard Ratios for Development of Retinopathy and Microalbuminuria Outcomes According to Glycemic Metrics in Overall Cohort**

|                               | Retinopathy |                    |                          |                        | Microalbuminuria |                    |                          |                        |
|-------------------------------|-------------|--------------------|--------------------------|------------------------|------------------|--------------------|--------------------------|------------------------|
|                               | N           | # (%) with outcome | Unadjusted HR (95% CI) * | Adjusted HR (95% CI) † | N                | # (%) with outcome | Unadjusted HR (95% CI) * | Adjusted HR (95% CI) † |
| <b>Time in range (%)</b>      |             |                    |                          |                        |                  |                    |                          |                        |
| ≥50                           | 466         | 36 (8%)            | 1.00                     | 1.00                   | 412              | 10 (2%)            | 1.00                     | 1.00                   |
| 40 - <50                      | 319         | 32 (10%)           | 1.54 (0.94, 2.55)        | 1.61 (0.97, 2.65)      | 291              | 20 (7%)            | 2.44 (1.05, 5.67)        | 2.40 (1.03, 5.58)      |
| 30 - <40                      | 271         | 59 (22%)           | 3.38 (2.22, 5.15)        | 3.37 (2.20, 5.15)      | 242              | 29 (12%)           | 4.74 (2.16, 10.40)       | 4.39 (2.01, 9.58)      |
| <30                           | 384         | 144 (38%)          | 6.23 (4.25, 9.13)        | 6.93 (4.69, 10.24)     | 338              | 57 (17%)           | 6.68 (3.35, 13.29)       | 6.98 (3.49, 13.96)     |
| <b>Mean glucose (mg/dL)</b>   |             |                    |                          |                        |                  |                    |                          |                        |
| <150                          | 323         | 17 (5%)            | 1.00                     | 1.00                   | 287              | 6 (2%)             | 1.00                     | 1.00                   |
| 150 - <180                    | 341         | 33 (10%)           | 1.58 (0.86, 2.91)        | 1.73 (0.93, 3.20)      | 308              | 14 (5%)            | 2.08 (0.70, 6.16)        | 2.02 (0.69, 5.90)      |
| 180 - <230                    | 403         | 81 (20%)           | 3.68 (2.16, 6.27)        | 3.84 (2.25, 6.56)      | 360              | 41 (11%)           | 4.97 (2.06, 12.00)       | 4.66 (1.93, 11.26)     |
| ≥230                          | 373         | 140 (38%)          | 8.36 (5.03, 13.88)       | 9.50 (5.66, 15.92)     | 328              | 55 (17%)           | 8.42 (3.43, 20.69)       | 8.59 (3.50, 21.11)     |
| <b>Time &gt;180 mg/dL (%)</b> |             |                    |                          |                        |                  |                    |                          |                        |
| <30                           | 302         | 19 (6%)            | 1.00                     | 1.00                   | 268              | 8 (3%)             | 1.00                     | 1.00                   |
| 30 - <45                      | 371         | 36 (10%)           | 1.65 (0.90, 3.02)        | 1.84 (1.01, 3.38)      | 334              | 13 (4%)            | 1.86 (0.56, 6.19)        | 1.81 (0.53, 6.16)      |
| 45 - <65                      | 401         | 79 (20%)           | 3.48 (2.04, 5.93)        | 3.56 (2.07, 6.12)      | 356              | 41 (12%)           | 4.93 (1.86, 13.06)       | 4.63 (1.74, 12.34)     |
| ≥65                           | 366         | 137 (37%)          | 8.20 (4.88, 13.81)       | 9.82 (5.77, 16.73)     | 325              | 54 (17%)           | 7.49 (2.80, 20.04)       | 7.71 (2.84, 20.89)     |
| <b>Time &gt;250 mg/dL (%)</b> |             |                    |                          |                        |                  |                    |                          |                        |
| <10                           | 277         | 15 (5%)            | 1.00                     | 1.00                   | 248              | 7 (3%)             | 1.00                     | 1.00                   |
| 10 - <25                      | 452         | 40 (9%)            | 1.60 (0.84, 3.06)        | 1.75 (0.91, 3.36)      | 404              | 17 (4%)            | 1.62 (0.64, 4.12)        | 1.61 (0.63, 4.10)      |
| 25 - <40                      | 314         | 68 (22%)           | 3.89 (2.11, 7.19)        | 4.12 (2.23, 7.60)      | 281              | 33 (12%)           | 4.52 (1.85, 11.07)       | 4.28 (1.75, 10.46)     |
| ≥40                           | 397         | 148 (37%)          | 8.28 (4.71, 14.58)       | 9.50 (5.33, 16.95)     | 350              | 59 (17%)           | 6.74 (2.91, 15.62)       | 6.90 (2.97, 16.05)     |
| <b>AUC 180 mg/dL</b>          |             |                    |                          |                        |                  |                    |                          |                        |
| <20                           | 321         | 19 (6%)            | 1.00                     | 1.00                   | 287              | 6 (2%)             | 1.00                     | 1.00                   |
| 20 - <40                      | 374         | 30 (8%)            | 1.31 (0.67, 2.56)        | 1.39 (0.71, 2.71)      | 336              | 15 (4%)            | 1.69 (0.59, 4.84)        | 1.65 (0.58, 4.69)      |
| 40 - <75                      | 390         | 86 (22%)           | 3.76 (2.20, 6.43)        | 3.96 (2.32, 6.75)      | 350              | 38 (11%)           | 4.92 (2.12, 11.41)       | 4.51 (1.93, 10.51)     |
| ≥75                           | 355         | 136 (38%)          | 7.65 (4.54, 12.89)       | 8.48 (5.01, 14.38)     | 310              | 57 (18%)           | 8.11 (3.48, 18.88)       | 8.25 (3.53, 19.29)     |
| <b>HBGI</b>                   |             |                    |                          |                        |                  |                    |                          |                        |
| <8                            | 356         | 23 (6%)            | 1.00                     | 1.00                   | 319              | 8 (3%)             | 1.00                     | 1.00                   |
| 8 - <14                       | 377         | 34 (9%)            | 1.37 (0.77, 2.43)        | 1.47 (0.83, 2.63)      | 342              | 16 (5%)            | 1.67 (0.70, 3.96)        | 1.64 (0.69, 3.88)      |
| 14 - <22                      | 355         | 78 (22%)           | 3.69 (2.27, 5.97)        | 3.88 (2.38, 6.33)      | 312              | 36 (12%)           | 4.43 (2.03, 9.68)        | 4.15 (1.89, 9.08)      |
| ≥22                           | 352         | 136 (39%)          | 7.37 (4.67, 11.63)       | 8.26 (5.19, 13.13)     | 310              | 56 (18%)           | 6.95 (3.32, 14.54)       | 7.12 (3.39, 14.97)     |
| <b>A1C</b>                    |             |                    |                          |                        |                  |                    |                          |                        |
| <7.0                          | 343         | 17 (5%)            | 1.00                     | 1.00                   | 309              | 10 (3%)            | 1.00                     | 1.00                   |
| 7.0 - <8.0                    | 399         | 33 (8%)            | 1.65 (0.91, 2.96)        | 1.67 (0.92, 3.01)      | 355              | 16 (5%)            | 1.40 (0.63, 3.08)        | 1.37 (0.62, 3.04)      |
| 8.0 - <9.0                    | 287         | 63 (22%)           | 4.62 (2.70, 7.91)        | 4.80 (2.79, 8.26)      | 257              | 26 (10%)           | 3.20 (1.54, 6.65)        | 3.07 (1.47, 6.42)      |
| ≥9.0                          | 411         | 158 (38%)          | 9.64 (5.83, 15.94)       | 11.03 (6.62, 18.37)    | 362              | 64 (18%)           | 5.97 (3.06, 11.66)       | 6.18 (3.14, 12.18)     |

## SUPPLEMENTARY DATA

For each metric, strata based on average of metric over the entire DCCT study period.

\* For each metric, P value =  $<0.001$  using a time-dependent version of the variable in discrete Cox PH regression models.

† For each metric, P value =  $<0.001$  using a time-dependent version of the variable in discrete Cox PH regression models stratified by the ETDRS level of retinopathy at baseline and adjusted for the pre-DCCT glyceic exposure represented by the pre-existing duration of diabetes separately for the primary and secondary cohorts.
